# Supplementary material for: Trace level Al3+ detection in aqueous media utilizing luminescent ensembles comprising pyrene laced dynamic surfactant assembly
Source: Royal Society of Chemistry journal article supplement (doi:10.1039/c7dt03401f), 2018-01-01
Supplement: c7dt03401f1.pdf [file c7dt03401f1.pdf]

Supporting Information for

## **Trace Level Al<sup>3+</sup> Detection in Aqueous Media utilizing Luminescent Ensembles Comprising Pyrene Laced Dynamic Surfactant Assembly**

Nilanjan Dey,<sup>a</sup> Santanu Bhattacharya,<sup>a, b,\*</sup>

<sup>a</sup>Department of Organic Chemistry, Indian Institute of Science, Bangalore 560012, India.

<sup>b</sup>Present Address: Director's Research Unit, Indian Association for Cultivation of Science, Kolkata 700032, India.

\*Corresponding author: E-mail: sb@orgchem.iisc.ernet.in

### Additional Spectra

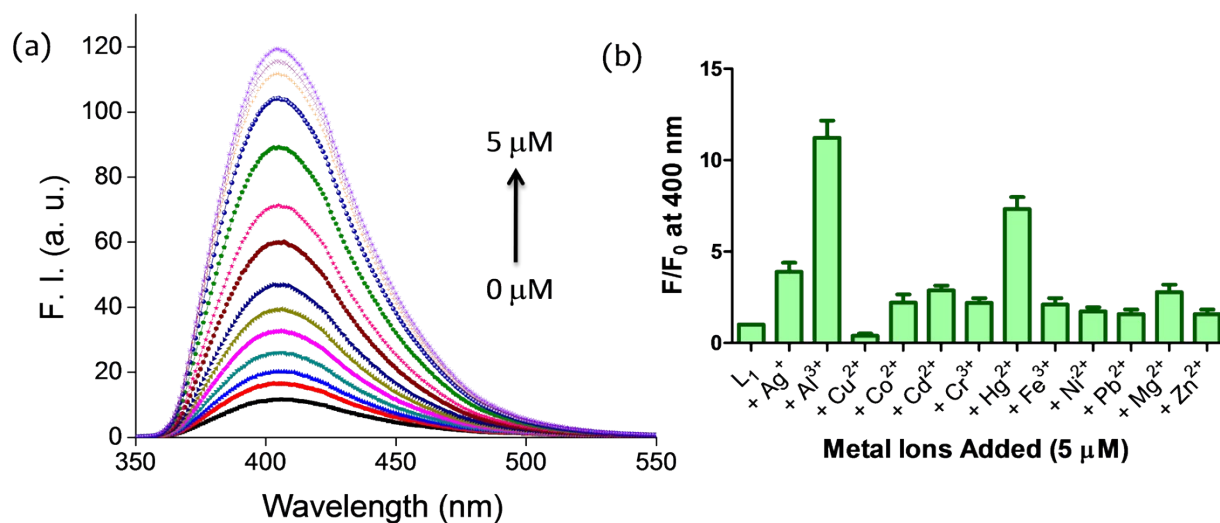

**Figure S1.** (a) Fluorescence titration of  $L_1$  (10  $\mu M$ ,  $\lambda_{ex} = 340$  nm) with  $Al^{3+}$  in acetonitrile medium. (b) Change in emission intensity of  $L_1$  (10  $\mu M$ ,  $\lambda_{ex} = 340$  nm) at 400 nm upon addition of different metal ions in acetonitrile.

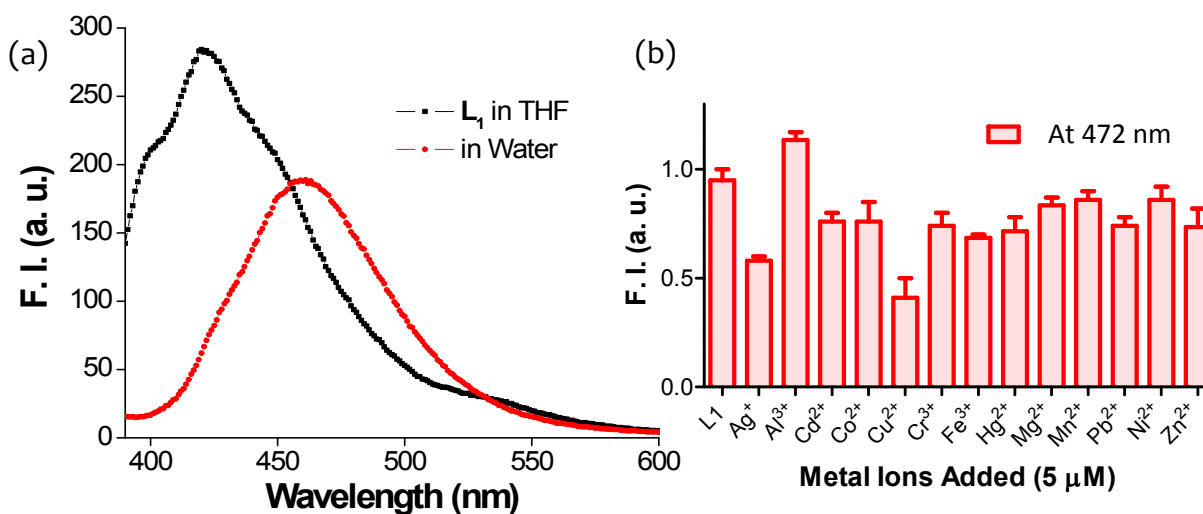

**Figure S2.** (a) Emission spectra of  $L_1$  ( $10 \mu\text{M}$ ,  $\lambda_{\text{ex}} = 340 \text{ nm}$ ) in THF and water medium. (b) Change in emission intensity of  $L_1$  ( $10 \mu\text{M}$ ,  $\lambda_{\text{ex}} = 340 \text{ nm}$ ) at  $472 \text{ nm}$  upon addition of different metal ions in water.

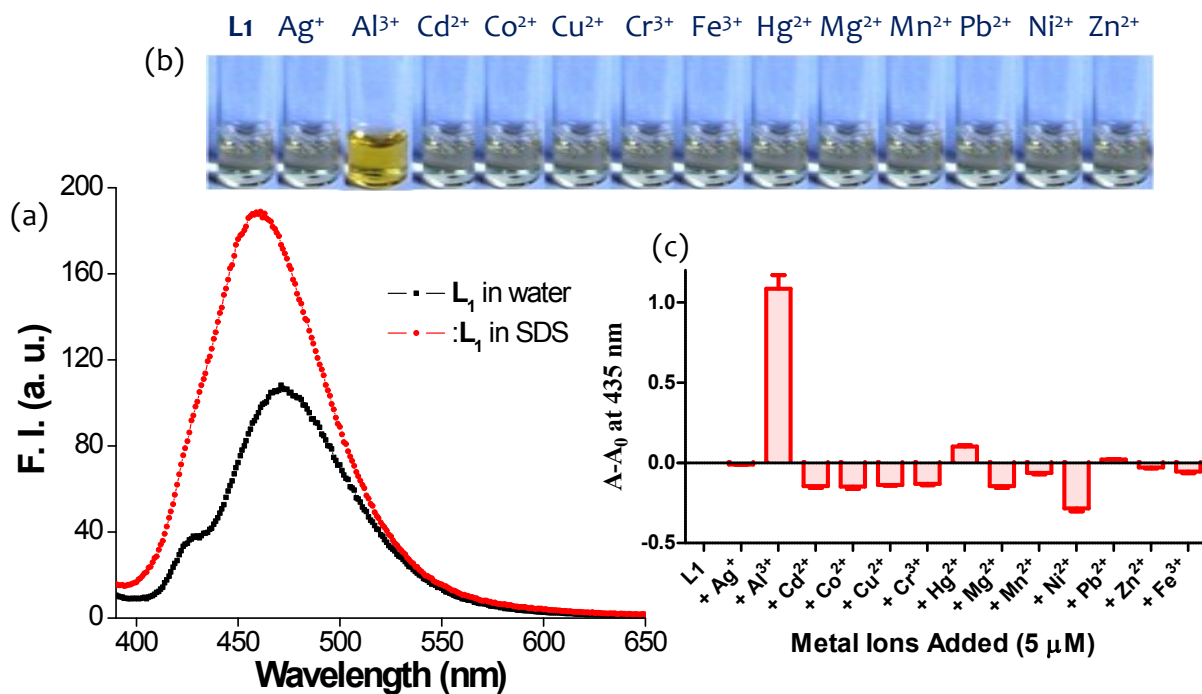

**Figure S3.** (a) Emission spectra of  $L_1$  ( $10 \mu\text{M}$ ,  $\lambda_{\text{ex}} = 340 \text{ nm}$ ) in water and SDS ( $8 \text{ mM}$ ) medium. (b) Images of compound in presence of different metal ions in SDS medium. (c) Change in absorbance of  $L_1$  ( $10 \mu\text{M}$ ,  $\lambda_{\text{ex}} = 340 \text{ nm}$ ) at  $435 \text{ nm}$  in SDS medium.

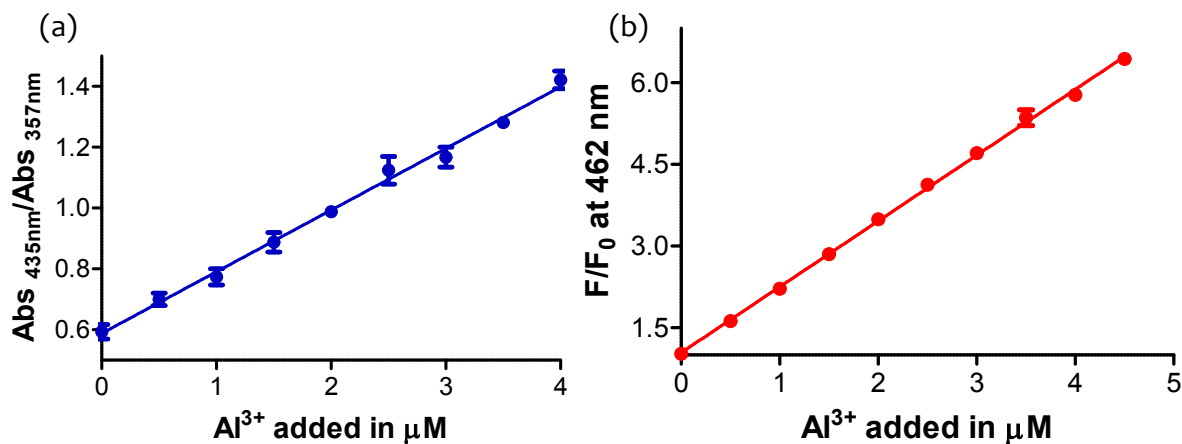

**Figure S4.** (a) Ratiometric response of **L**<sub>1</sub> (10 μM) in presence of Al<sup>3+</sup> in SDS (8 mM) medium. (b) Change in emission intensity of **L**<sub>1</sub> (10 μM, λ<sub>ex</sub> = 340 nm) in presence Al<sup>3+</sup> in SDS (8 mM) medium.

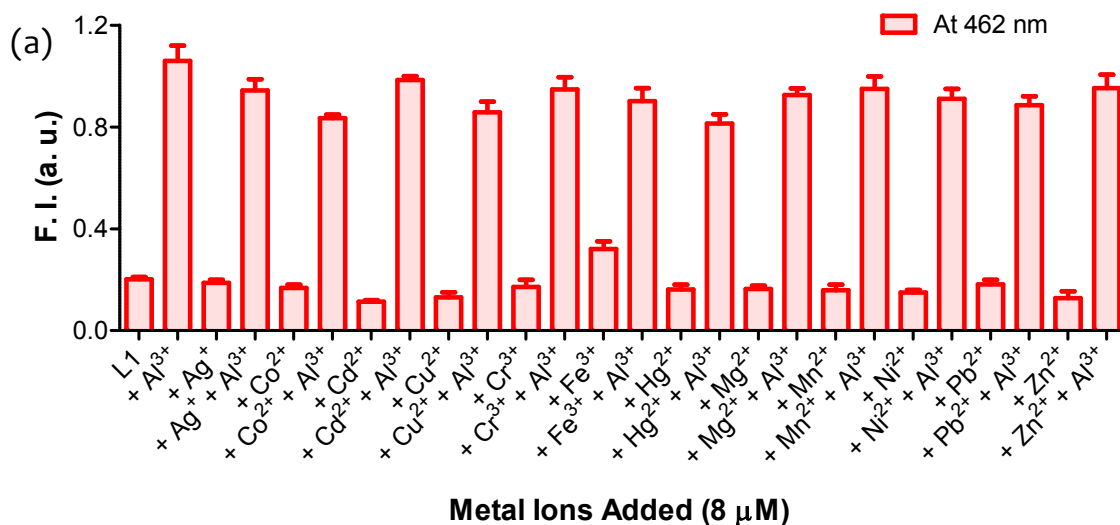

(b)

| Medium        | Anisotropy   |
|---------------|--------------|
| L1 in water   | 0.087 ± 0.01 |
| L1 in Birj-58 | 0.102 ± 0.03 |
| L1 in CTAB    | 0.125 ± 0.07 |
| L1 in SDS     | 0.167 ± 0.02 |

**Figure S5.** (a) Al<sup>3+</sup> induced change in emission intensity of **L**<sub>1</sub> (10 μM, λ<sub>ex</sub> = 340 nm) in presence of other metal ions (8 μM) SDS (8 mM) medium. (c) Anisotropy values of **L**<sub>1</sub> in different surfactant medium.

#### Detail procedure for calculating detection limit

A solution of compound **L**<sub>1</sub> in SDS micelle medium (8 mM) showed enhancement in the emission intensity at 462 nm band upon addition of Al<sup>3+</sup> (λ<sub>ex</sub> = 340 nm). Therefore

measurements have been carried out at this wavelength for calibration. Overall 7 measures and 10 blank replicates were used for calibration.

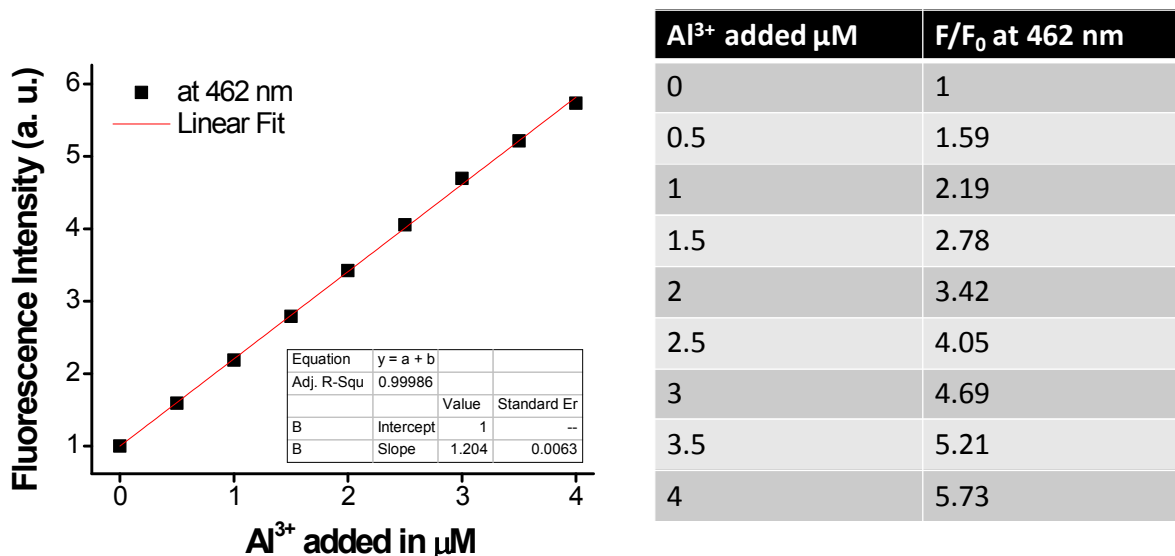

**Figure S6.** Calibration plot of L<sub>1</sub> with Al<sup>3+</sup> at 462 nm wavelength

Al<sup>3+</sup> concentrations were calculated from the equation 1 as obtained from the calibration curve (a straight line) (fig. S6).

$$Y = 1.2043x + 1 \dots \dots (1)$$

Then these calculated caffeine concentrations, represented as [Al<sup>3+</sup>]calcd. were plotted against actually added Al<sup>3+</sup>, represented as [Al<sup>3+</sup>]actual. Slope (b) of this plot (fig. S7) was further used for calculating the detection limit in terms of concentration.

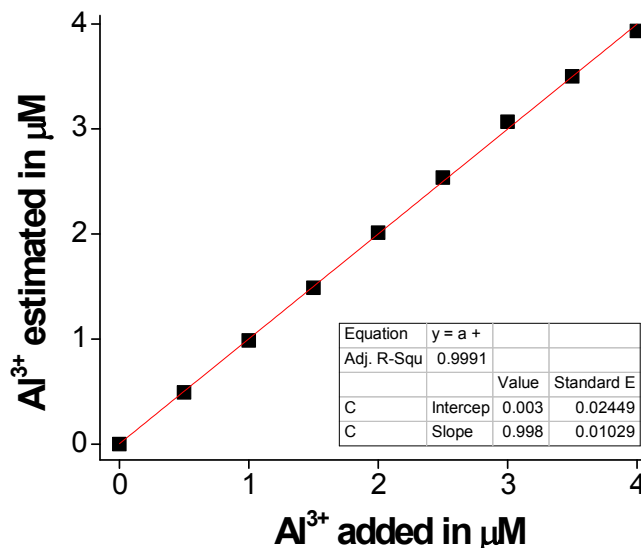

**Figure S7.** New calibration plot

Thereafter, from the measured blank emission values of  $L_1$  (10  $\mu\text{M}$ ,  $\lambda_{\text{ex}} = 340 \text{ nm}$ ), the concentrations of  $\text{Al}^{3+}$  were calculated using the equation [1].

| Replicate | F/F <sub>0</sub> at 462 nm |
|-----------|----------------------------|
| 1         | 1.012                      |
| 2         | 1.034                      |
| 3         | 1.022                      |
| 4         | 1.013                      |
| 5         | 1.035                      |
| 6         | 1.025                      |
| 7         | 1.022                      |
| 8         | 1.031                      |
| 9         | 1.028                      |
| 10        | 1.026                      |

The mean ( $\bar{x}$ ) and the standard deviation ( $s$ ) from  $\text{Al}^{3+}$  concentrations as calculated from the blank replicates are,

$$(\bar{x} \pm s) = (0.02018 + 0.00653) \times 10^{-6}$$

The decision limit ( $L_c$ ) was calculated using equation [2].

$$L_c = t_c \times s \times (1 + 1/N)^{1/2} \dots\dots\dots [2]$$

For the probability level of 5%,  $t_c$  will be 1.833 for 9 degrees of freedom ( $GL = N-1 = 10-1 = 9$ ) and  $N$  denotes the number of blank replicates.

So, in the present case, considering  $N = 10$ , we obtain,

$$L_c = 1.833 \times (0.00653 \times 10^{-6}) \times (1 + 1/10)^{1/2} = 0.01257 \times 10^{-6} \text{ M}$$

The detection limit ( $L_D$ ) is considered as the double of the decision limit,

$$L_D = 2 \times L_c = 0.0251 \times 10^{-6} \text{ M}$$

The detection limit ( $x_D$ ) in concentration term will be

$$x_D = 2x_c = 2 L_c/b = (0.0251 \times 10^{-6})/0.99915 = 0.02516 \times 10^{-6} \text{ M}$$

Thus, the detection limit for caffeine is obtained as 0.025  $\mu\text{M}$  or 5.36 ppb.

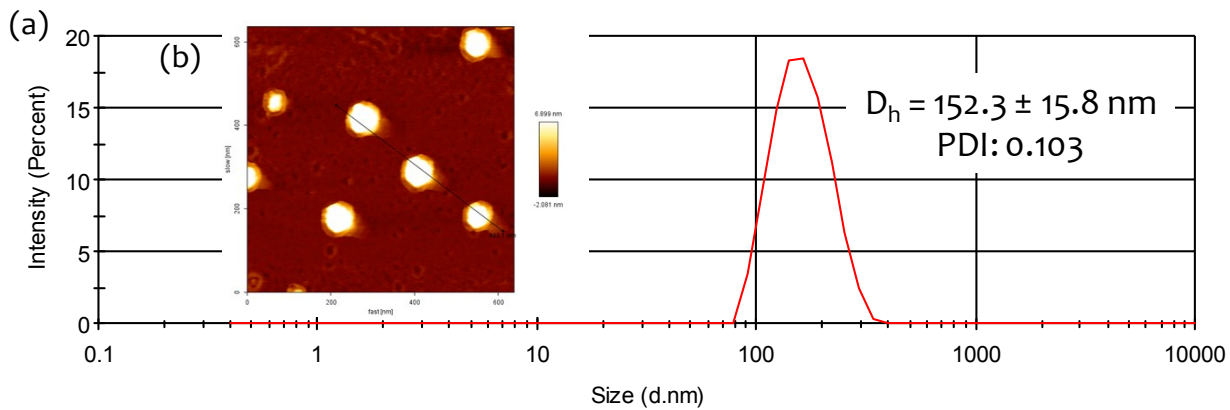

**Figure S8.** (a) Hydrodynamic diameter of  $L_1$  doped SoyPC vesicle in water. (b) AFM images of  $L_1$  doped SoyPC vesicle in water.

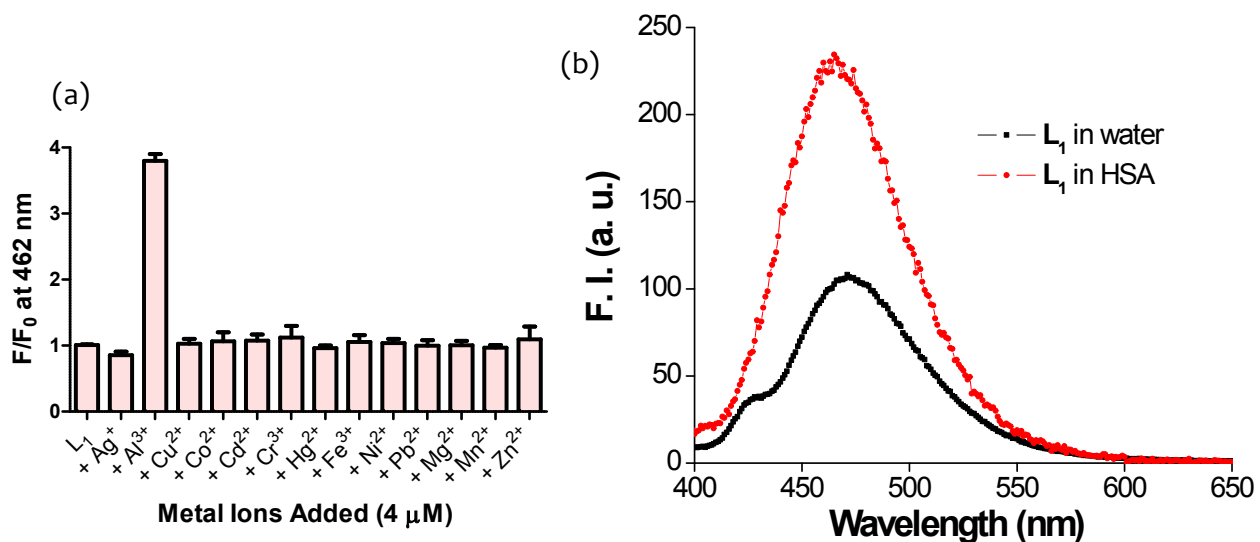

**Figure S9.** (a) Emission intensity of  $L_1$  doped SoyPC (10  $\mu\text{M}$ ,  $\lambda_{\text{ex}} = 340 \text{ nm}$ ) with different metal ions in water. (b) Emission spectra of  $L_1$  (10  $\mu\text{M}$ ,  $\lambda_{\text{ex}} = 340 \text{ nm}$ ) in water and in presence of HSA.

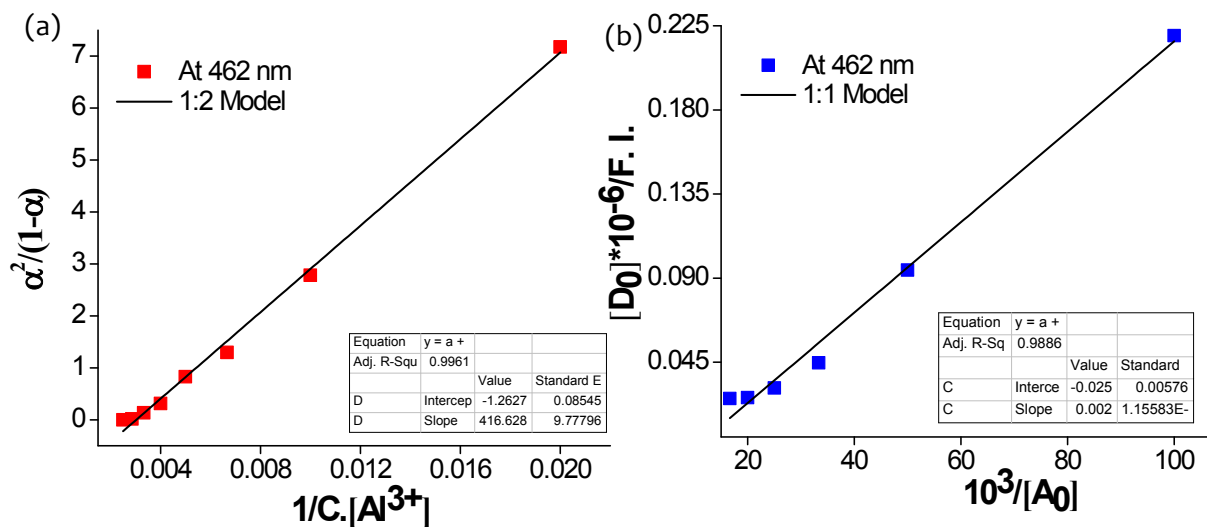

**Figure S10.** (a) Determination of binding constant  $L_1$  ( $10 \mu\text{M}$ ,  $\lambda_{\text{ex}} = 340 \text{ nm}$ ) with  $\text{Al}^{3+}$  in SDS medium. (b) Determination of binding constant  $L_3$  ( $10 \mu\text{M}$ ,  $\lambda_{\text{ex}} = 340 \text{ nm}$ ) with  $\text{Al}^{3+}$  in SDS medium.

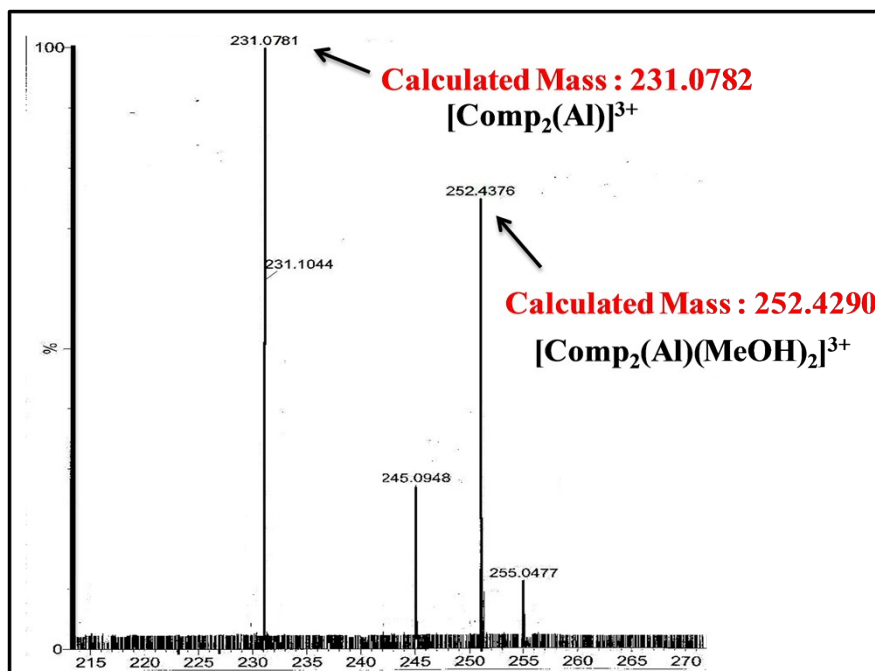



**Figure S11.** ESI-MS mass spectrum of  $L_1$  in presence of  $Al^{3+}$  in SDS medium.

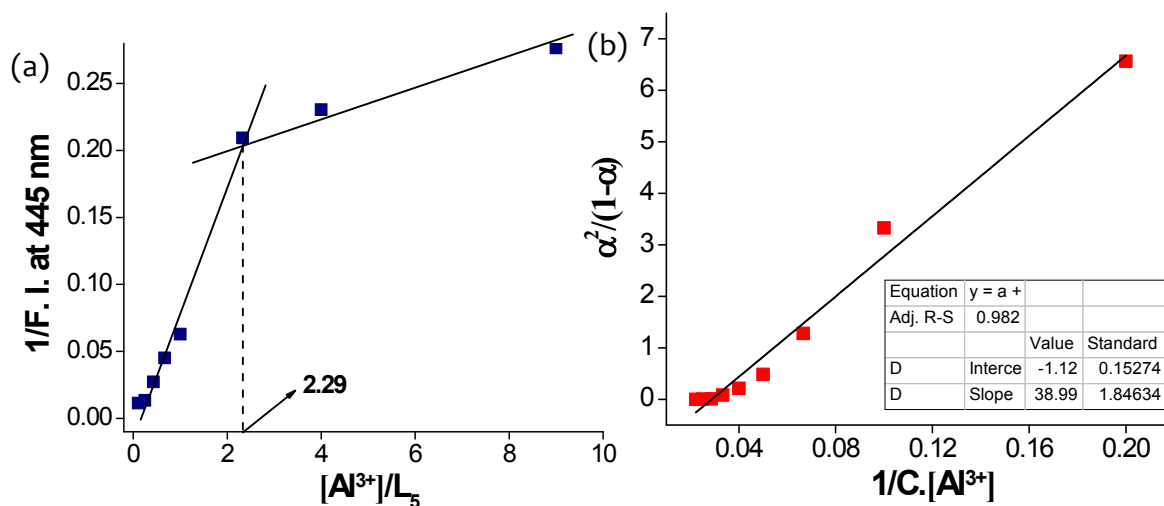

**Figure S12.** (a) Job plot analyses of  $L_5$  demonstrating 2:1 binding with the  $Al^{3+}$  ion. (b) Binding constant was calculated with  $Al^{3+}$  ion using Benesi-Hildebrand equation for the 2:1 stoichiometry.

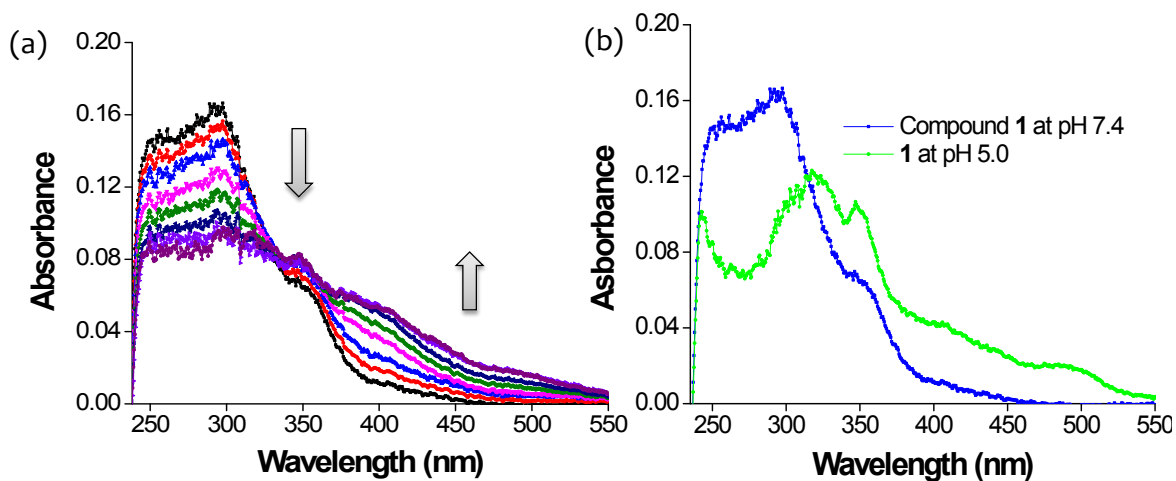

**Figure S13.** (a) UV-visible spectra of  $L_1$  (10  $\mu\text{M}$ ) with SDS (0-1.2 mM) in water medium. (b) UV-visible spectra of  $L_1$  (10  $\mu\text{M}$ ) in different buffer medium (7.4 and 5.0) in water.

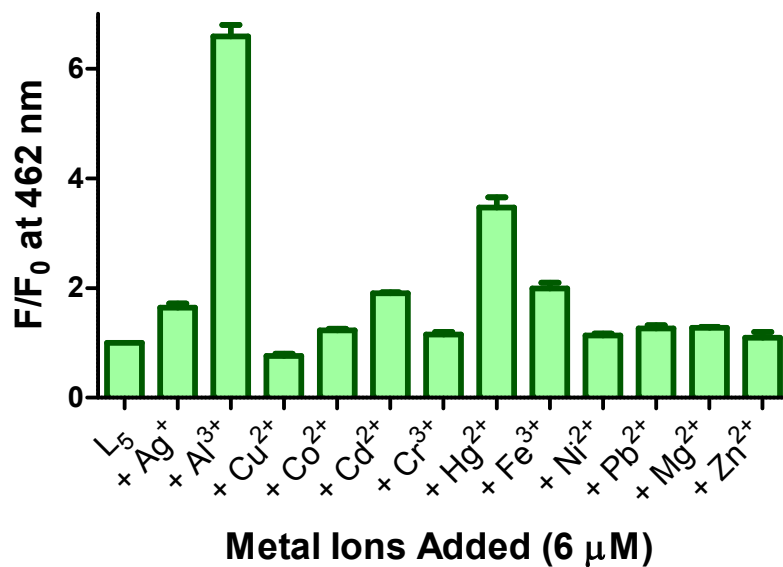

**Figure S14.** Change in emission intensity of L<sub>5</sub> (10 μM, λ<sub>ex</sub> = 340 nm) at 462 nm upon addition of different metal ions in SDS micelle medium (8 mM).

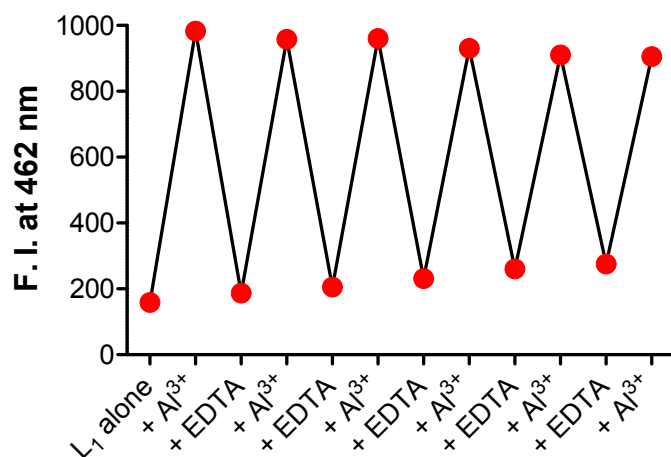

**Figure S15.** EDTA-mediated recovery experiments with L<sub>1</sub> (10 μM) at 462 nm (5 μM) each time after addition of 5 μM of Al<sup>3+</sup> in SDS micelle medium (8 mM).

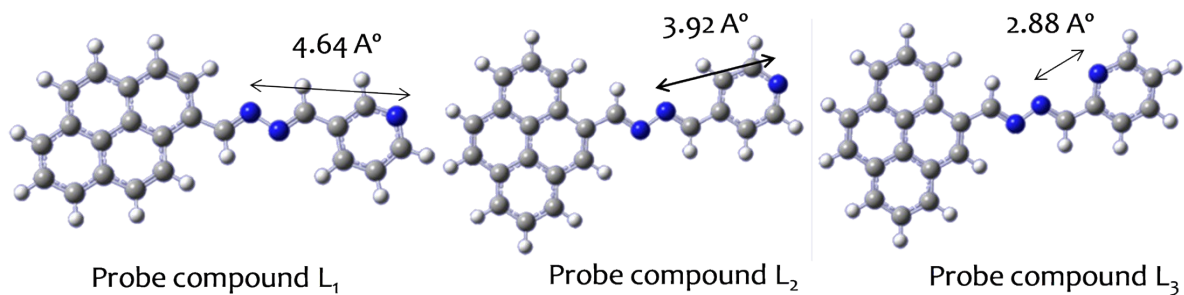

**Figure S16.** Energy minimized structures of L<sub>1</sub>, L<sub>2</sub> and L<sub>3</sub> using B3LYP/6-31G\* method.

| Probes         | Negative charge density on pyridyl nitrogen |
|----------------|---------------------------------------------|
| L <sub>1</sub> | -0.4235                                     |
| L <sub>2</sub> | -0.4123                                     |
| L <sub>3</sub> | -0.3892                                     |
| L <sub>4</sub> | -0.5612                                     |

**Figure S17.** The Mulliken charge distribution on pyridine nitrogen ends of compounds L<sub>1</sub>, L<sub>2</sub>, L<sub>3</sub> and L<sub>4</sub> using B3LYP/6-31G\* method.

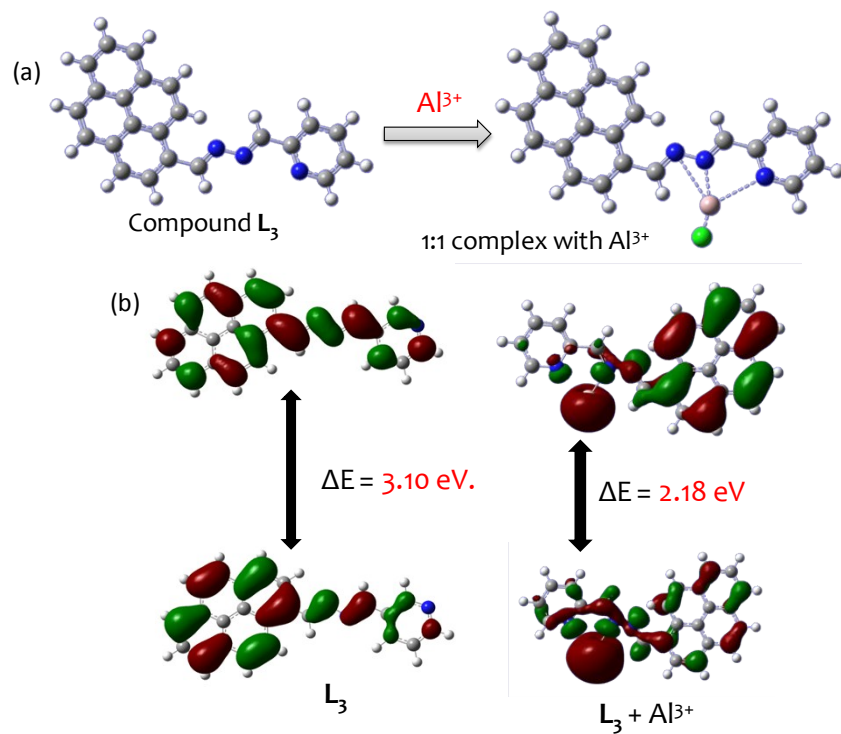

**Figure S18.** (a) Energy minimized structures of  $L_3$  and  $L_3 + Al^{3+}$  using B3LYP/6-31G\* method. (b) FMO analysis of  $L_3$  and  $L_3 + Al^{3+}$  using B3LYP/6-31G\* method.

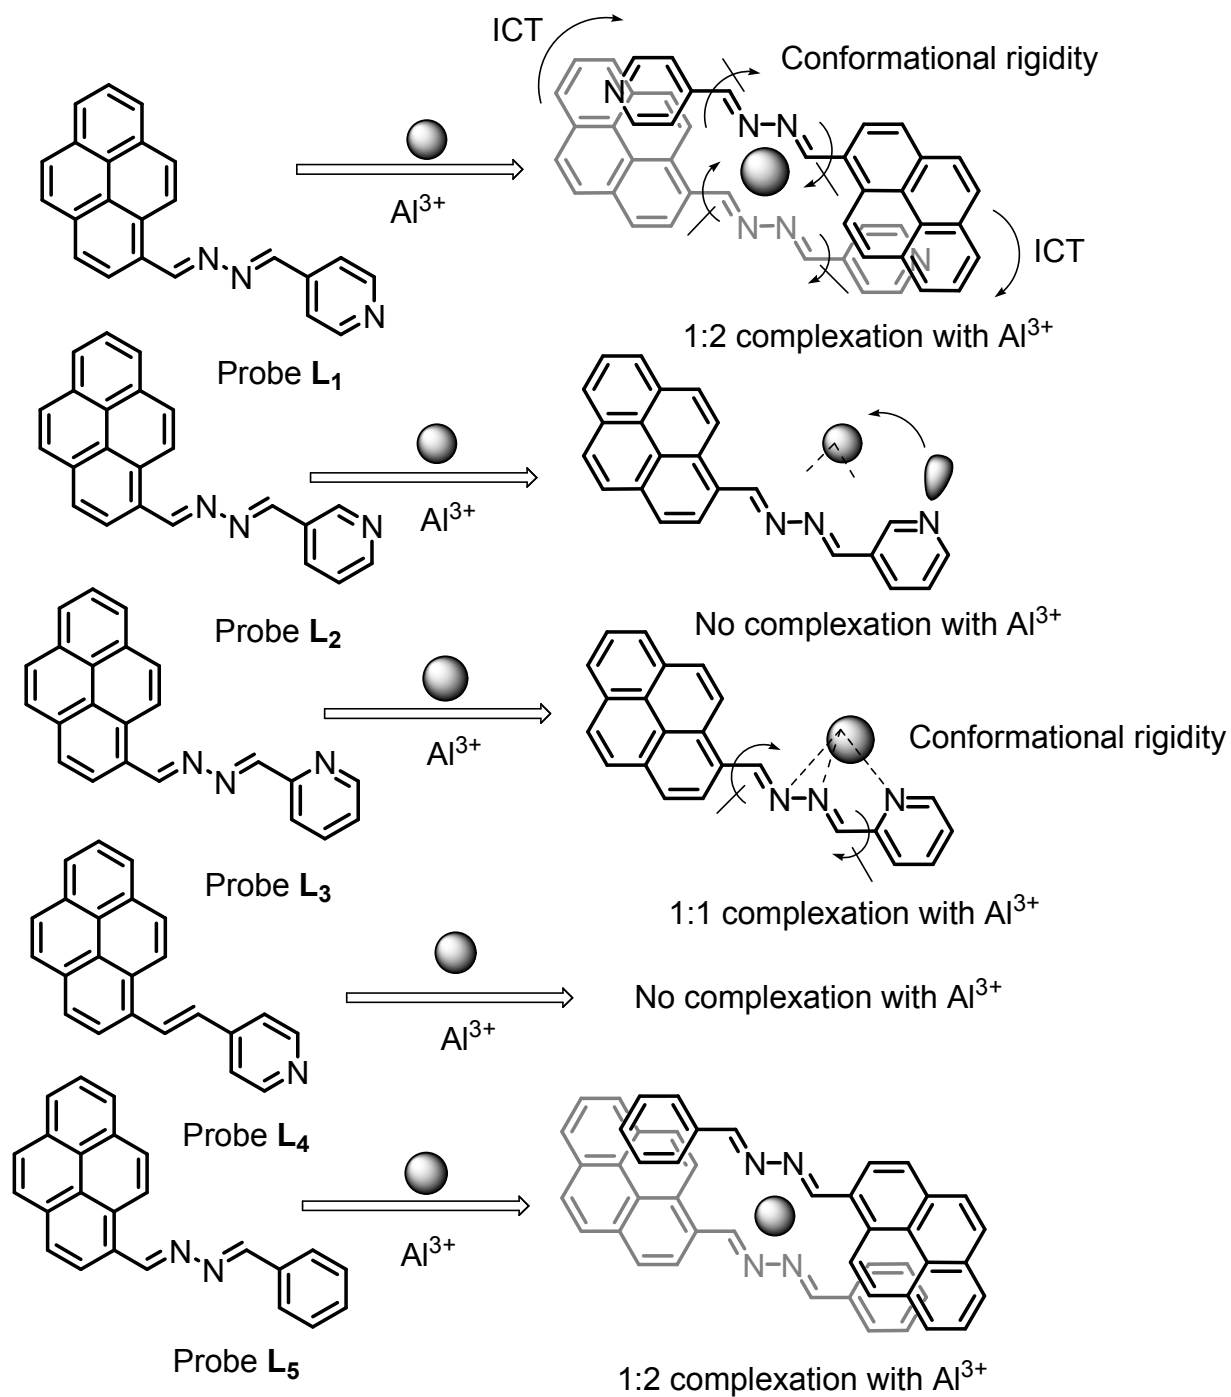

**Figure S19.** Probable binding modes of compounds **L**<sub>1</sub> to **L**<sub>5</sub> with Al<sup>3+</sup> in SDS micelle medium

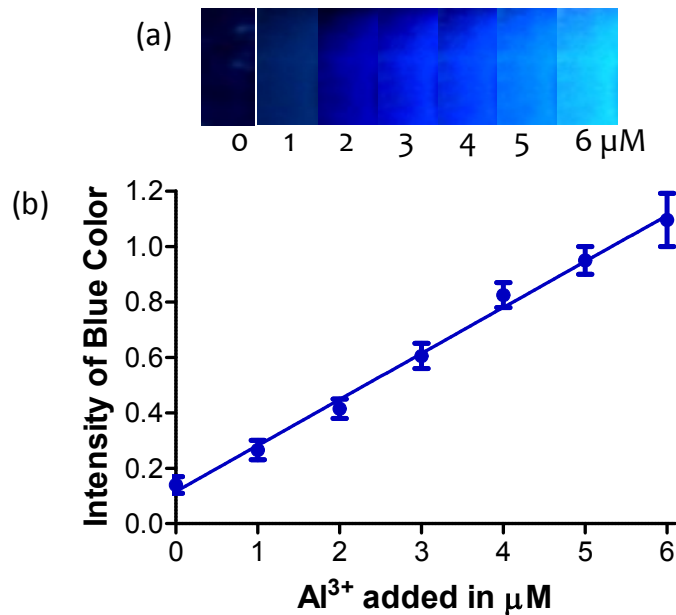

**Figure S20.** (a) Fluorescence images of **L**<sub>1</sub> coated TLC plates in presence of different amounts of Al<sup>3+</sup> (0 – 6 μM). (b) Change in emission intensities of the precoated TLC plates in presence of increasing amount of Al<sup>3+</sup> (quantified using ImageJ software).

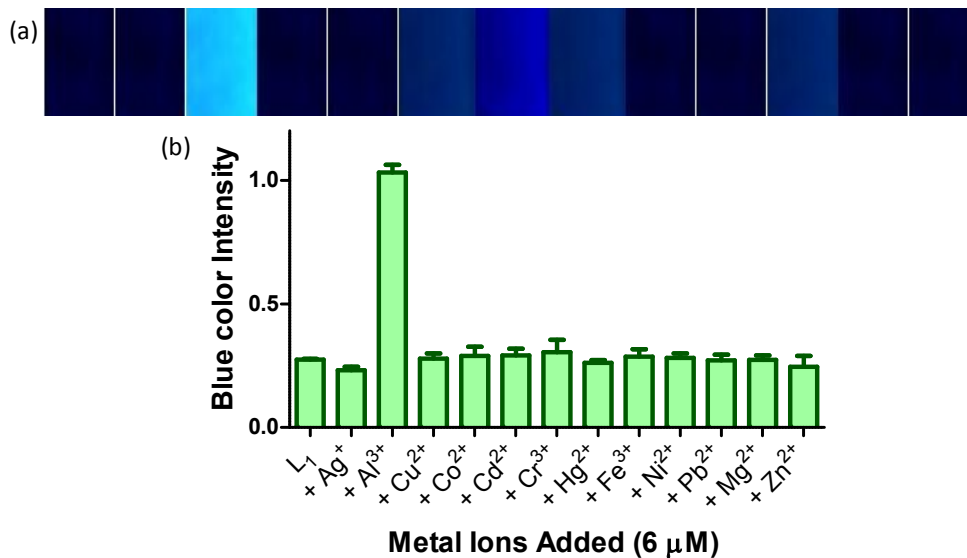

**Figure S21.** (a) Fluorescence images of L<sub>1</sub> coated TLC plates in presence of different metal ions (6  $\mu\text{M}$ ) in water. (b) Change in emission intensities of the precoated TLC plates in presence of different analytes (quantified using ImageJ software).

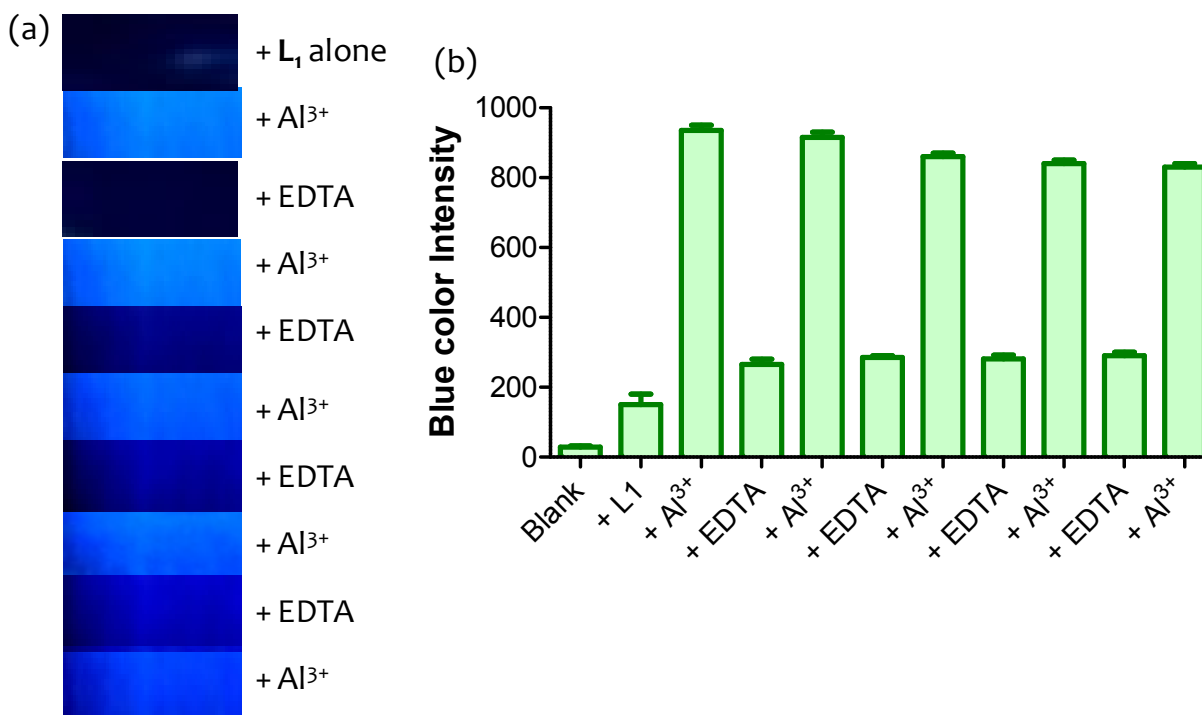

**Figure S22.** (a) Fluorescence images showing reusability of TLC plates for Al<sup>3+</sup> sensing. (b) Change in emission intensities of the precoated TLC plates in presence of different analytes (quantified using ImageJ software).

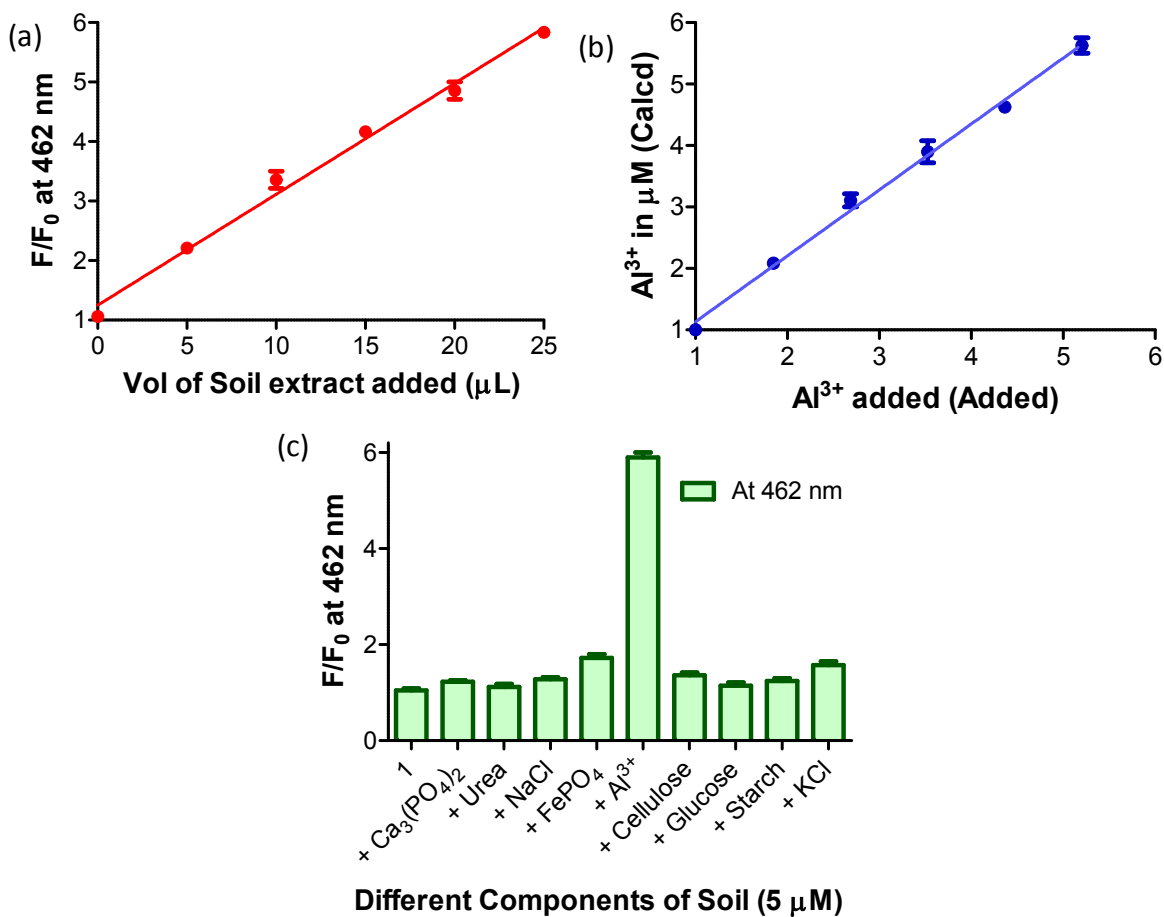



**Figure S23.** (a) Change in emission intensity of  $L_1$  ( $10 \mu\text{M}$ ,  $\lambda_{\text{ex}} = 340 \text{ nm}$ ) with  $\text{Al}^{3+}$ -contaminated soil extract in SDS medium. (b) Recovery plot of  $L_1$  ( $10 \mu\text{M}$ ,  $\lambda_{\text{ex}} = 340 \text{ nm}$ ) with  $\text{Al}^{3+}$ -contaminated soil extract in SDS medium. (c) Change in emission intensities of  $L_1$  ( $10 \mu\text{M}$ ,  $\lambda_{\text{ex}} = 340 \text{ nm}$ ) in presence of different components of soil in SDS medium.

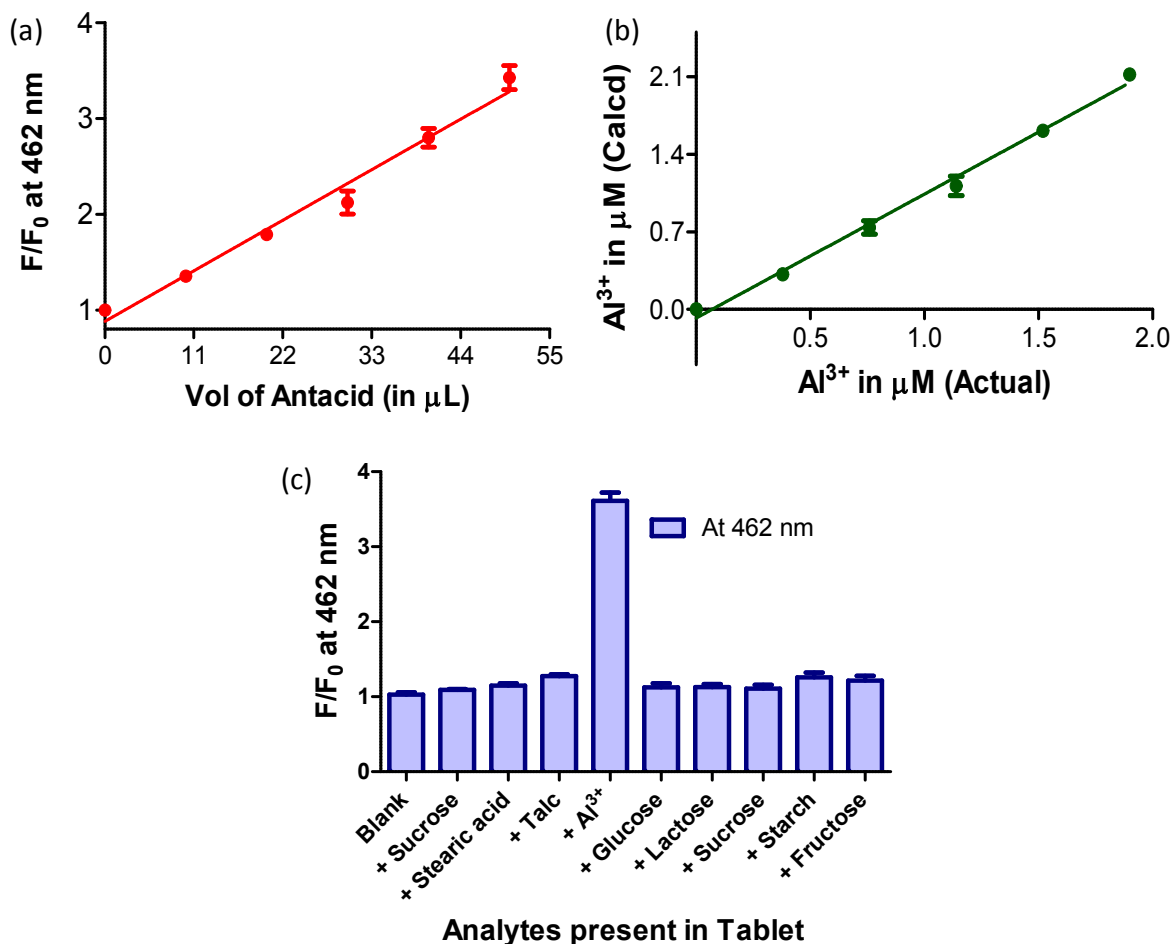

**Figure S24.** (a) Change in emission intensity of  $L_1$  ( $10 \mu\text{M}$ ,  $\lambda_{\text{ex}} = 340 \text{ nm}$ ) with aqueous extract of pharmaceutical tablet (Digene) in SDS medium. (b) Recovery plot of  $L_1$  ( $10 \mu\text{M}$ ,  $\lambda_{\text{ex}} = 340 \text{ nm}$ ) with aqueous extract of pharmaceutical tablet (Digene) in SDS medium. (c) Change in emission intensities of  $L_1$  ( $10 \mu\text{M}$ ,  $\lambda_{\text{ex}} = 340 \text{ nm}$ ) in presence of different components of Digene in SDS medium.

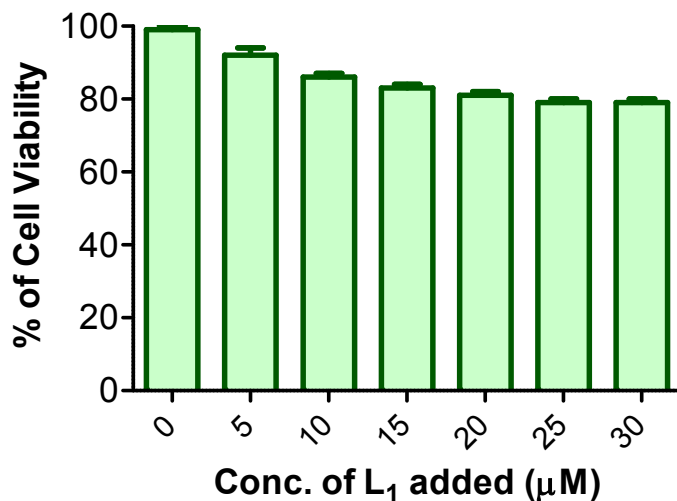

**Figure S25.** Cell viability assay of compound  $L_1$  in HeLa cells

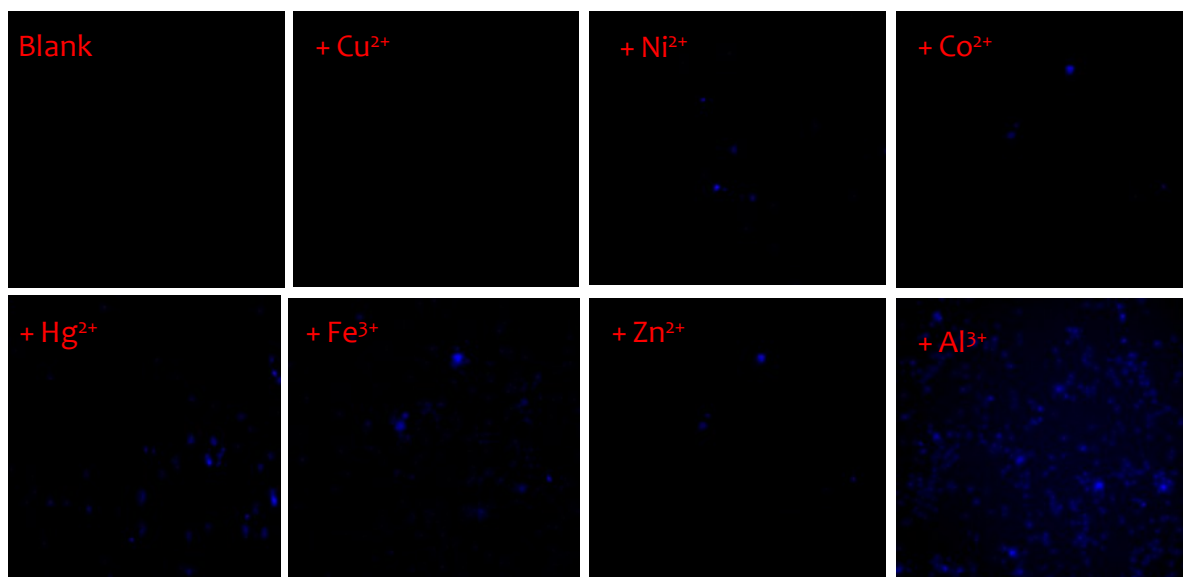

**Figure S26.** Fluorescent microscopic images of HeLa cells incubated with 10  $\mu\text{M}$  of  $\text{L}_1$  in presence and absence of different metal ions (20  $\mu\text{M}$ ).

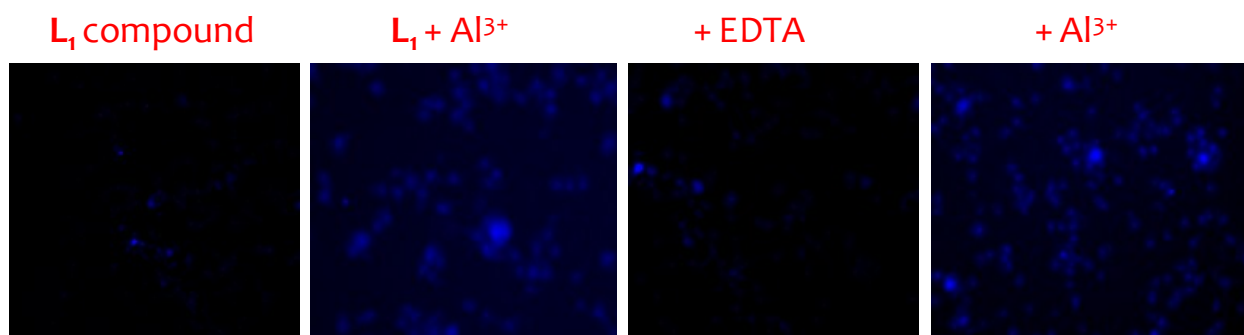

**Figure S27.** Reversible bioimaging of  $\text{Al}^{3+}$  (20  $\mu\text{M}$ ) in HeLa cells using probe  $\text{L}_1$  (10  $\mu\text{M}$ ) in presence of chelating agent EDTA (20  $\mu\text{M}$ ).

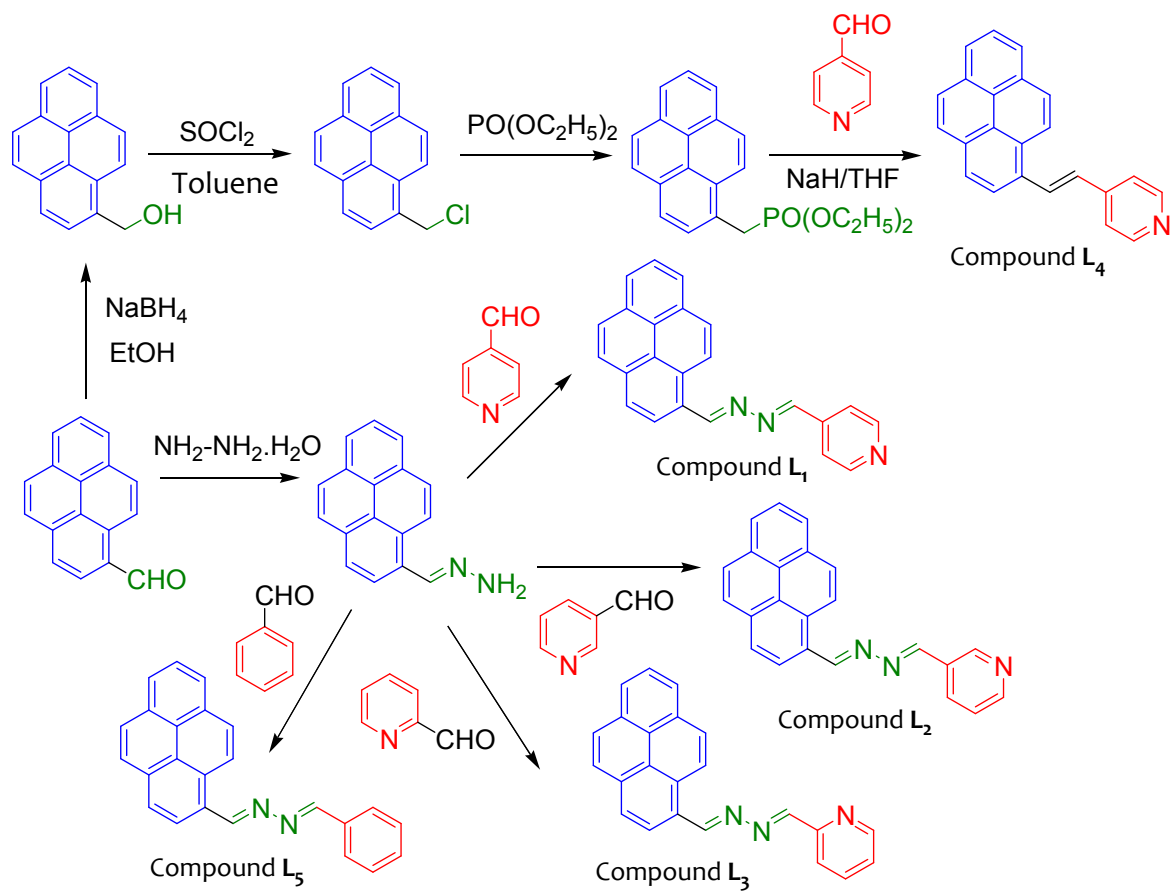

**Scheme S1.** Synthetic routes to compounds **L<sub>1</sub>** to **L<sub>5</sub>**
